# Supplementary material
Source: PubMed Central journal article supplement (PMC7097843)
Supplement: jamapsychiatry-77-797-s001.pdf [file jamapsychiatry-77-797-s001.pdf]

## Supplementary Online Content

Dalsgaard S, McGrath J, Østergaard SD, et al. Association of mental disorder in childhood and adolescence with subsequent educational achievement. *JAMA Psychiatry*. Published online March 25, 2020. doi: 10.1001/jamapsychiatry.2020.0217

**eTable 1.** Diagnostic Classification of Mental Disorders According to the ICD-10 and Corresponding ICD-8 Diagnoses

**eTable 2.** Transformation of Grades From Old Scale (Used Until 2007) to New Scale

**eTable 3.** Standardized Mean Grade Difference at the Final 9th Grade Exam in Danish During 2002-2016, in Individuals Who Sat the Exam (274,332 girls and 268,168 boys) for Individuals With Mental Disorders as Compared to Individuals Without Mental Disorders, Stratified on Sex and With 95% Confidence Intervals

**eTable 4.** Standardized Mean Grade Difference at the Final 9th Grade Exam in Mathematics During 2002-2016, in Individuals Who Sat the Exam (274,332 girls and 268,168 boys) for Individuals With Mental Disorders as Compared to Individuals Without Mental Disorders, Stratified on Sex and With 95% Confidence Intervals

This supplementary material has been provided by the authors to give readers additional information about their work.

| <b>eTable 1. Diagnostic Classification of Mental Disorders According to the ICD-10 and Corresponding ICD-8 Diagnoses</b> |                     |                                                                        |                     |
|--------------------------------------------------------------------------------------------------------------------------|---------------------|------------------------------------------------------------------------|---------------------|
| <b>Diagnosis</b>                                                                                                         | <b>ICD-10 codes</b> | <b>Equivalent ICD-8 codes</b>                                          | <b>Earliest age</b> |
| Any mental disorder                                                                                                      | F00-F99             | 290-315                                                                | 1                   |
| Organic mental disorder                                                                                                  | F00-F09             | 290.09, 290.10, 290.11, 290.18, 290.19, 292.x9, 293.x9, 294.x9, 309.x9 | 1                   |
| Substance use disorder                                                                                                   | F10-F19             | 291.x9, 294.39, 303.x, 304.x                                           | 10                  |
| - Disorder due to alcohol use                                                                                            | F10                 | 291.x9, 303.x                                                          | 10                  |
| - Disorder due to cannabis use                                                                                           | F12                 | 304.59                                                                 | 10                  |
| Schizophrenia spectrum disorder                                                                                          | F20-F29             | 295.x, 296.89, 297.x9, 298.29-298.99, 299.04, 299.05, 299.09, 301.83   | 10                  |
| - Schizophrenia                                                                                                          | F20                 | 295.x9 (excl. 295.79)                                                  | 10                  |
| Mood disorder                                                                                                            | F30-F39             | 296.x9 (excl. 296.89), 298.09, 298.19, 300.49, 301.19                  | 10                  |
| - Bipolar disorder                                                                                                       | F30-F31             | 296.19, 296.39, 298.19                                                 | 10                  |
| - Unipolar depression                                                                                                    | F32-F33             | 296.09, 296.29, 298.09, 300.49                                         | 10                  |
| Anxiety disorder                                                                                                         | F40-F48             | 300.x9 (excl. 300.49), 305.x9 305.68, 307.99                           | 5                   |
| - Obsessive compulsive disorder                                                                                          | F42                 | 300.39                                                                 | 5                   |
| Eating disorder                                                                                                          | F50                 | 306.50, 306.58, 306.59                                                 | 5                   |
| - Anorexia nervosa                                                                                                       | F50.0 F50.1         | 306.50                                                                 | 5                   |
| - Bulimia                                                                                                                | F50.2 F50.3         | -                                                                      | 5                   |
| - EDNOS                                                                                                                  | F50.9               | 306.58 306.59                                                          | 5                   |
| Personality disorder                                                                                                     | F60                 | 301.x9 (excl 301.19), 301.80, 301.81, 301.82, 301.84                   | 14                  |
| Intellectual disability                                                                                                  | F70-F79             | 311.xx, 312.xx, 313.xx, 314.xx, 315.xx                                 | 1                   |
| Other developmental disorders                                                                                            | F80-F83             | 306.0x, 306.1x, 306.3x                                                 | 1                   |
| - Disorder of language                                                                                                   | F80                 | 306.0x                                                                 | 1                   |
| - Disorder of scholastic skills                                                                                          | F81                 | 306.1x                                                                 | 1                   |
| - Disorder of motoric skills                                                                                             | F82                 | 306.3x                                                                 | 1                   |
| Autism spectrum disorder                                                                                                 | F84 (excl 84.2-3)   | 299.00, 299.01, 299.02, 299.03                                         | 1                   |
| - Childhood autism                                                                                                       | F84.0               | 299.00                                                                 | 1                   |
| - Asperger's syndrome                                                                                                    | F84.5               | -                                                                      | 1                   |
| ADHD - All subtypes                                                                                                      | F90+F98.8           | 308.01                                                                 | 1                   |
| - ADHD Combined Subtype                                                                                                  | F90.0               | -                                                                      | 1                   |
| ODD/CD                                                                                                                   | F91                 | 308.03, 308.04, 308.05, 308.06                                         | 1                   |
| Attachment disorder                                                                                                      | F94 (excl. F94.0)   | 308.07                                                                 | 1                   |
| Tic disorder                                                                                                             | F95                 | 306.29                                                                 | 1                   |

Abbreviations: EDNOS - Eating Disorder not otherwise specified; ADHD - Attention Deficit Hyperactivity Disorder; ODD/CD - Oppositional defiant disorder/conduct disorder.

**eTable 2.** Transformation of Grades From Old Scale (Used Until 2007) to New Scale

| <b>Old scale</b> | <b>New scale</b> |
|------------------|------------------|
| 0                | -3               |
| 3 and 5          | 00               |
| 6                | 02               |
| 7                | 4                |
| 8 and 9          | 7                |
| 10               | 10               |
| 11 and 13        | 12               |

**eTable 3.** Standardized Mean Grade Difference<sup>§</sup> at the Final 9<sup>th</sup> Grade Exam in Danish During 2002-2016, in Individuals Who Sat the Exam (274,332 girls and 268,168 boys) for Individuals With Mental Disorders as Compared to Individuals Without Mental Disorders, Stratified on Sex and With 95% Confidence Intervals<sup>#</sup>

| Diagnosis                       | N, females | N, males | Standardized mean grade difference (95% CI) | Standardized mean grade difference (95% CI) | Sex difference, P value <sup>€</sup> |
|---------------------------------|------------|----------|---------------------------------------------|---------------------------------------------|--------------------------------------|
|                                 |            |          | Females                                     | Males                                       |                                      |
| Any mental disorder             | 9,923      | 9,924    | -0.15 (-0.17 to -0.14)                      | -0.06 (-0.08 to -0.05)                      | <0.001                               |
| Organic mental disorder         | 13         | 45       | -0.37 (-0.76 to 0.01)                       | -0.04 (-0.25 to 0.17)                       | 0.140                                |
| Substance use disorder          | 107        | 90       | -0.59 (-0.73 to -0.46)                      | -0.14 (-0.29 to 0.01)                       | <0.001                               |
| - Disorder due to alcohol use   | 14         | 14       | -0.85 (-1.22 to -0.47)                      | -0.29 (-0.67 to 0.10)                       | 0.041                                |
| - Disorder due to cannabis use  | 63         | 61       | -0.56 (-0.74 to -0.38)                      | -0.15 (-0.33 to 0.03)                       | 0.002                                |
| Schizophrenia spectrum disorder | 324        | 194      | -0.22 (-0.30 to -0.14)                      | -0.02 (-0.13 to 0.08)                       | 0.003                                |
| - Schizophrenia                 | 56         | 37       | -0.20 (-0.39 to 0.00)                       | 0.08 (-0.15 to 0.31)                        | 0.074                                |
| Mood disorder                   | 1,526      | 613      | -0.01 (-0.04 to 0.03)                       | 0.00 (-0.06 to 0.05)                        | 0.926                                |
| - Bipolar disorder              | 27         | 15       | -0.01 (-0.28 to 0.26)                       | 0.07 (-0.29 to 0.43)                        | 0.736                                |
| - Unipolar depression           | 1,450      | 545      | 0.00 (-0.04 to 0.04)                        | 0.00 (-0.06 to 0.06)                        | 0.984                                |
| Anxiety disorders               | 4,705      | 2,540    | -0.12 (-0.14 to -0.10)                      | -0.01(-0.03 to 0.02)                        | <0.001                               |
| - Obsessive compulsive disorder | 985        | 763      | 0.12 (0.07 to 0.16)                         | 0.05 (0.00 to 0.10)                         | 0.047                                |
| Eating disorders                | 1,866      | 169      | 0.28 (0.24 to 0.31)                         | 0.07 (-0.03 to 0.18)                        | 0.001                                |
| - Anorexia nervosa              | 904        | 76       | 0.45 (0.40 to 0.50)                         | 0.10 (-0.06 to 0.26)                        | <0.001                               |
| - Bulimia                       | 117        | <4       | 0.22 (0.09 to 0.35)                         | -                                           | -                                    |
| - EDNOS                         | 616        | 62       | 0.09 (0.04 to 0.15)                         | 0.02 (-0.17 to 0.20)                        | 0.429                                |
| Personality disorder            | 412        | 79       | -0.21 (-0.29 to -0.14)                      | -0.07 (-0.23 to 0.09)                       | 0.112                                |
| Intellectual disability         | 129        | 171      | -0.95 (-1.07 to -0.82)                      | -0.25 (-0.36 to -0.14)                      | <0.001                               |
| Other developmental disorders   | 649        | 1,541    | -0.64 (-0.70 to -0.59)                      | -0.16 (-0.20 to -0.13)                      | <0.001                               |
| - Disorder of language          | 131        | 328      | -0.75 (-0.87 to -0.63)                      | -0.20 (-0.27 to -0.12)                      | <0.001                               |
| - Learning disorder             | 177        | 333      | -0.90 (-1.01 to -0.79)                      | -0.28 (-0.36 to -0.20)                      | <0.001                               |
| - Disorder of motoric skills    | 34         | 159      | -0.43 (-0.68 to -0.18)                      | -0.01 (-0.12 to 0.10)                       | 0.002                                |
| Autism spectrum disorder        | 738        | 2,301    | -0.08 (-0.14 to -0.03)                      | -0.04 (-0.07 to -0.01)                      | 0.169                                |
| - Childhood autism              | 80         | 310      | -0.28 (-0.44 to -0.12)                      | -0.13 (-0.21 to -0.05)                      | 0.087                                |
| - Asperger's syndrome           | 312        | 1,071    | 0.03 (-0.05 to 0.11)                        | 0.01 (-0.03 to 0.05)                        | 0.595                                |
| ADHD - All subtypes             | 1,338      | 3,310    | -0.55 (-0.59 to -0.51)                      | -0.12 (-0.15 to -0.10)                      | <0.001                               |
| - ADHD Combined Subtype         | 739        | 2,199    | -0.56 (-0.61 to -0.51)                      | -0.12 (-0.15 to -0.09)                      | <0.001                               |
| ODD/CD                          | 183        | 474      | -0.45 (-0.56 to -0.35)                      | -0.09 (-0.16 to -0.03)                      | <0.001                               |
| Attachment disorder             | 287        | 461      | -0.54 (-0.63 to -0.45)                      | 0.01 (-0.05 to 0.08)                        | <0.001                               |
| Tic disorder                    | 142        | 643      | -0.05 (-0.17 to 0.07)                       | 0.01 (-0.04 to 0.07)                        | 0.347                                |

Abbreviations: EDNOS - Eating Disorder not otherwise specified; ADHD - Attention Deficit Hyperactivity Disorder; ODD/CD - Oppositional defiant disorder/conduct disorder.

<sup>§</sup> Differences are measured in standard deviations (SD), standardized as Z-scores by subtracting the mean and dividing by the SD.

# Analyses adjusted for year of examination, parental age, parental education, birth order, singleton vs. twins, preterm birth, and small for gestational age.

€ p-value for relative sex differences in standardized mean grade in Danish, in individuals with that mental disorder, when compared to same-sex individuals without that mental disorder

**eTable 4.** Standardized Mean Grade Difference<sup>§</sup> at the Final 9<sup>th</sup> Grade Exam in Mathematics During 2002-2016, in Individuals Who Sat the Exam (274,332 girls and 268,168 boys) for Individuals With Mental Disorders as Compared to Individuals Without Mental Disorders, Stratified on Sex and With 95% Confidence Intervals<sup>#</sup>

| Diagnosis                       | N, females | N, males | Standardized mean grade difference (95% CI) | Standardized mean grade difference (95% CI) | Sex difference, P value <sup>€</sup> |
|---------------------------------|------------|----------|---------------------------------------------|---------------------------------------------|--------------------------------------|
|                                 |            |          | Females                                     | Males                                       |                                      |
| Any mental disorder             | 9,923      | 9,924    | -0.33 (-0.35 to -0.31)                      | -0.35 (-0.37 to -0.33)                      | 0.071                                |
| Organic mental disorder         | 13         | 45       | -0.39 (-0.90 to 0.11)                       | -0.37 (-0.64 to -0.09)                      | 0.927                                |
| Substance use disorder          | 107        | 90       | -0.78 (-0.96 to -0.60)                      | -0.83 (-1.03 to -0.63)                      | 0.734                                |
| - Disorder due to alcohol use   | 14         | 14       | -1.04 (-1.52 to -0.55)                      | -0.72 (-1.22 to -0.21)                      | 0.374                                |
| - Disorder due to cannabis use  | 63         | 61       | -0.70 (-0.93 to -0.46)                      | -0.86 (-1.10 to -0.63)                      | 0.324                                |
| Schizophrenia spectrum disorder | 324        | 194      | -0.48 (-0.59 to -0.38)                      | -0.43 (-0.56 to -0.29)                      | 0.520                                |
| - Schizophrenia                 | 56         | 37       | -0.27 (-0.52 to -0.02)                      | -0.29 (-0.59 to 0.01)                       | 0.907                                |
| Mood disorder                   | 1,526      | 613      | -0.23 (-0.28 to -0.19)                      | -0.25 (-0.33 to -0.18)                      | 0.724                                |
| - Bipolar disorder              | 27         | 15       | -0.23 (-0.58 to 0.12)                       | -0.17 (-0.64 to 0.30)                       | 0.840                                |
| - Unipolar depression           | 1,450      | 545      | -0.23 (-0.28 to -0.18)                      | -0.25 (-0.33 to -0.17)                      | 0.724                                |
| Anxiety disorders               | 4,705      | 2,540    | -0.32 (-0.35 to -0.30)                      | -0.27 (-0.31 to -0.24)                      | 0.027                                |
| - Obsessive compulsive disorder | 985        | 763      | -0.13 (-0.19 to -0.07)                      | -0.10 (-0.16 to -0.03)                      | 0.457                                |
| Eating disorders                | 1,866      | 169      | 0.07 (0.02 to 0.11)                         | -0.03 (-0.18 to 0.11)                       | 0.192                                |
| - Anorexia nervosa              | 904        | 76       | 0.25 (0.19 to 0.31)                         | 0.14 (-0.07 to 0.35)                        | 0.349                                |
| - Bulimia                       | 117        | <4       | -0.13 (-0.30 to 0.04)                       | -                                           | -                                    |
| - EDNOS                         | 616        | 62       | -0.17 (-0.25 to -0.10)                      | -0.15 (-0.39 to 0.09)                       | 0.896                                |
| Personality disorder            | 412        | 79       | -0.55 (-0.64 to -0.46)                      | -0.45 (-0.66 to -0.23)                      | 0.376                                |
| Intellectual disability         | 129        | 171      | -1.10 (-1.27 to -0.94)                      | -1.17 (-1.31 to -1.02)                      | 0.575                                |
| Other developmental disorders   | 649        | 1,541    | -0.70 (-0.78 to -0.63)                      | -0.53 (-0.57 to -0.48)                      | <0.001                               |
| - Disorder of language          | 131        | 328      | -0.68 (-0.84 to -0.52)                      | -0.45 (-0.55 to -0.35)                      | 0.020                                |
| - Learning disorder             | 177        | 333      | -0.94 (-1.08 to -0.79)                      | -0.69 (-0.79 to -0.59)                      | 0.006                                |
| - Disorder of motoric skills    | 34         | 159      | -0.58 (-0.90 to -0.25)                      | -0.26 (-0.41 to -0.12)                      | 0.087                                |
| Autism spectrum disorder        | 738        | 2,301    | -0.16 (-0.22 to -0.09)                      | -0.16 (-0.20 to -0.12)                      | 0.961                                |
| - Childhood autism              | 80         | 310      | -0.23 (-0.44 to -0.02)                      | -0.33 (-0.43 to -0.22)                      | 0.413                                |
| - Asperger's syndrome           | 312        | 1,071    | -0.03 (-0.14 to 0.07)                       | -0.04 (-0.09 to 0.02)                       | 0.934                                |
| ADHD - All subtypes             | 1,338      | 3,310    | -0.65 (-0.70 to -0.59)                      | -0.53 (-0.56 to -0.49)                      | <0.001                               |
| - ADHD Combined Subtype         | 739        | 2,199    | -0.66 (-0.73 to -0.59)                      | -0.52 (-0.56 to -0.48)                      | 0.001                                |
| ODD/CD                          | 183        | 474      | -0.65 (-0.78 to -0.51)                      | -0.43 (-0.51 to -0.34)                      | 0.008                                |
| Attachment disorder             | 287        | 461      | -0.60 (-0.71 to -0.48)                      | -0.29 (-0.37 to -0.20)                      | <0.001                               |
| Tic disorder                    | 142        | 643      | -0.29 (-0.44 to -0.14)                      | -0.31 (-0.39 to -0.24)                      | 0.783                                |

Abbreviations: EDNOS - Eating Disorder not otherwise specified; ADHD - Attention Deficit Hyperactivity Disorder; ODD/CD - Oppositional defiant disorder/conduct disorder.

<sup>§</sup> Differences are measured in standard deviations (SD), standardized as Z-scores by subtracting the mean and dividing by the SD.

<sup>#</sup> Analyses adjusted for year of examination, parental age, parental education, birth order, singleton vs. twins, preterm birth, and small for gestational age.

€ p-value for relative sex differences in standardized mean grade in Mathematics, in individuals with that mental disorder, when compared to same-sex individuals without that mental disorder
